# Supplementary material
Source: PubMed Central journal article supplement (PMC1914195)
Supplement: plntphys_pp.107.099325_1.pdf [file plntphys_pp.107.099325_1.pdf]

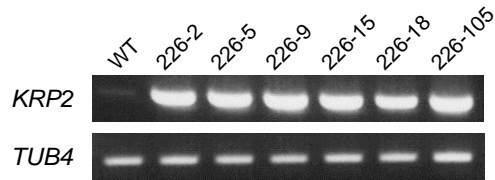

**Figure S1.** Construction of transgenic plants overexpressing the *KRP2* gene. RNA was extracted from 21-day-old transgenic plants. The *KRP2* expression level was measured by reverse transcription-polymerase chain reaction (RT-PCR). Primers specific to *TUBULIN $\beta$  4* gene amplification (5'-AATACGTCGGCGATTCTCCG-3' and 5'-CTTAGGAGAAGGAAACACTG-3') were used as a control (Horiguchi *et al.*, 2005). The total RT-PCR products from 28 cycles were visualized by gel electrophoresis.
