# Supplementary material
Source: PubMed Central journal article supplement (PMC1914195)
Supplement: plntphys_pp.107.099325_2.pdf [file plntphys_pp.107.099325_2.pdf]

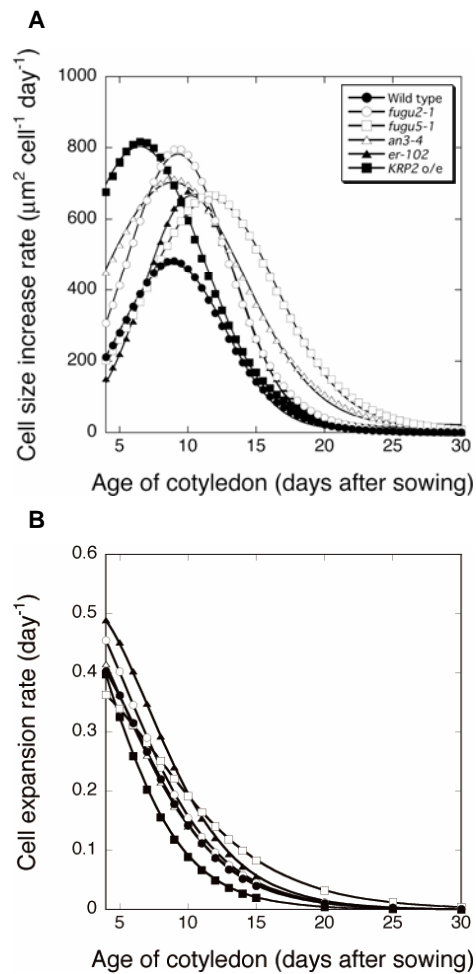

**Figure S2.** Kinematic analysis of cotyledon growth. A, Cell size increase rates in the cotyledons of wild type and compensation-exhibiting mutants. B, Cell expansion rates in the cotyledons of wild type and compensation-exhibiting mutants. Cell size increase rates and cell expansion rates were calculated from the results shown in Figure 6B (see Materials and Methods for details).
