# Supplementary material
Source: PubMed Central journal article supplement (PMC1914195)
Supplement: plntphys_pp.107.099325_3.pdf [file plntphys_pp.107.099325_3.pdf]

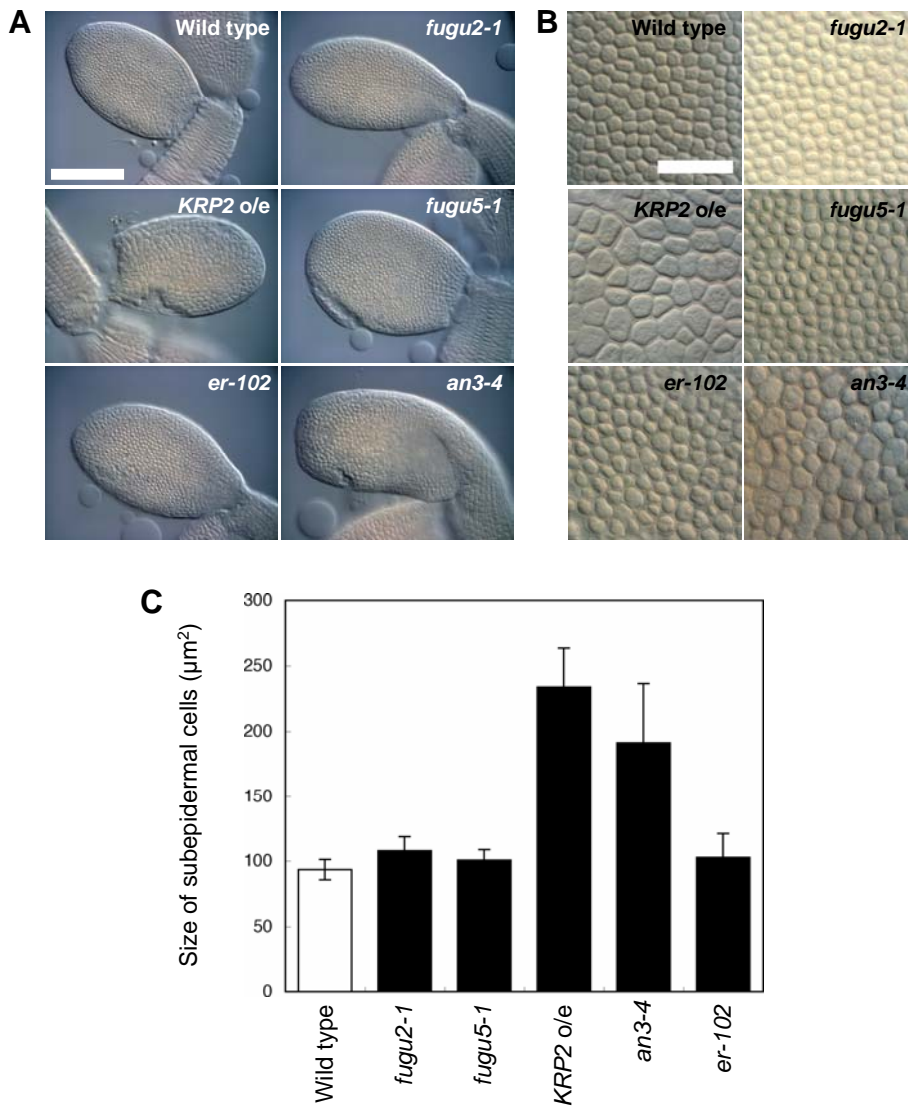

**Figure S3.** Size of subepidermal cells in the embryonic cotyledons of wild type and compensation-exhibiting mutants. To determine the size of subepidermal cells in embryonic cotyledons, embryos were isolated shortly after seed imbibition. A, Micrographs showing the embryos of wild type and compensation-exhibiting mutants. Scale bar represents 200  $\mu\text{m}$ . B, Adaxial subepidermal cells in embryonic cotyledons. Scale bar represents 50  $\mu\text{m}$ . C, Average area of subepidermal cells. Data are represented as the mean  $\pm$  SD ( $n = 140$  cells, from seven embryos).
